# Supplementary material
Source: Springer Nature journal article supplement (https://www.springermedizin.de/resource/supplementary/13063_2011_984_MOESM1_ESM.pdf/9619558)

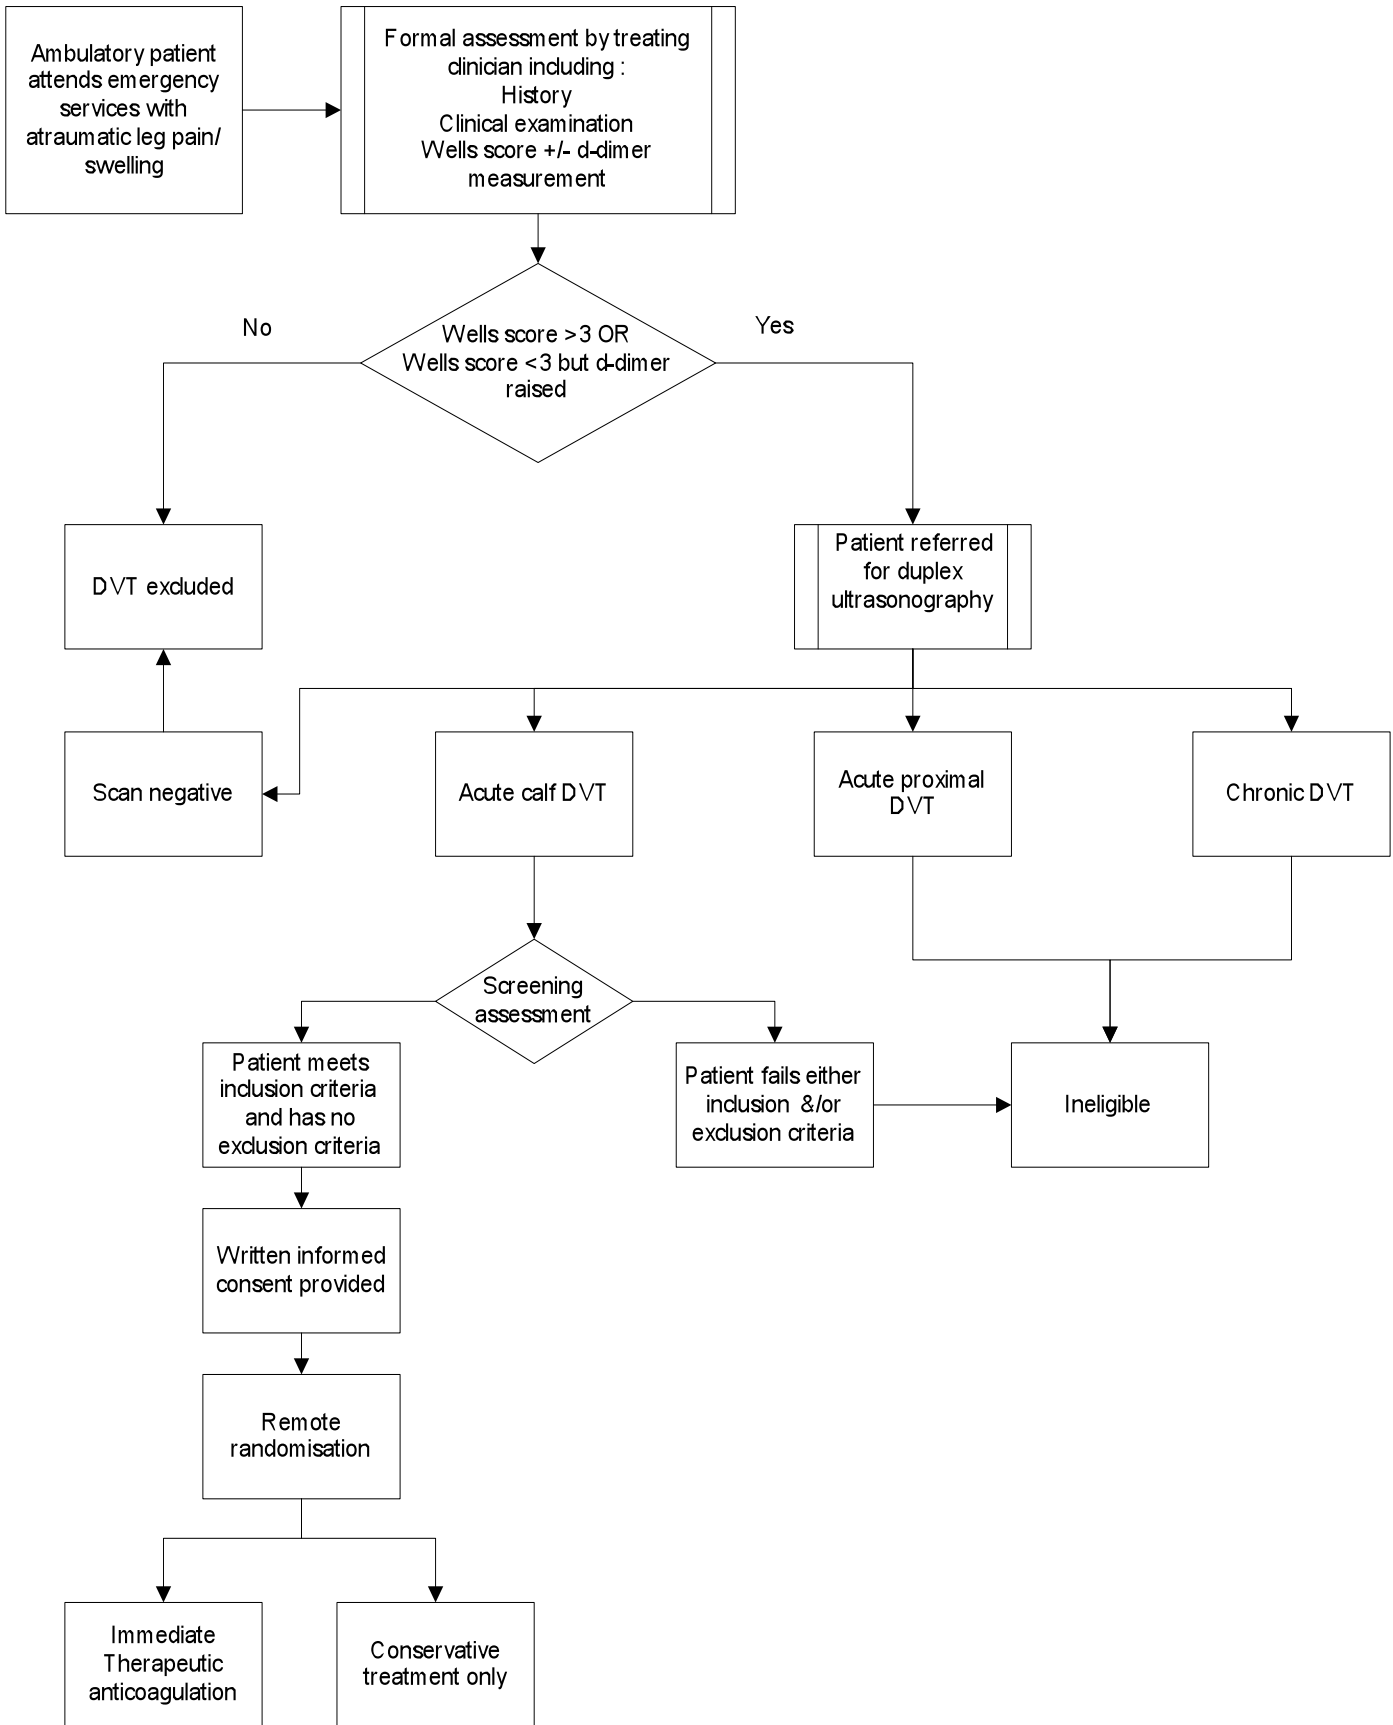

Supplement: MOESM1 [file 9619558]
